# Supplementary material for: Regime types and regime change: A new dataset on democracy, coups, and political institutions
Source: Springer Nature journal article supplement (doi:10.1007/s11558-019-09345-1), 2019-02-04
Supplement: 11558_2019_9345_MOESM1_ESM.pdf [file 11558_2019_9345_MOESM1_ESM.pdf]

## Appendix: Regime Types and Regime Change: A New Dataset on Democracy, Coups, and Political Institutions

Table A1. Descriptive statistics

|                                | Mean    | Standard deviation | Observations |
|--------------------------------|---------|--------------------|--------------|
| <i>Panel</i>                   |         |                    |              |
| Democracy                      | .369    | .483               | 3835         |
| Five-year democracy            | .320    | .467               | 3835         |
| Coups                          | .040    | 1.96               | 4427         |
| Assassinations                 | .038    | .191               | 2346         |
| Repression                     | .444    | 1.259              | 2813         |
| Log GDP per capita             | 8.157   | 1.142              | 3149         |
| Log population                 | .884    | 1.813              | 3149         |
| Independent                    | .676    | .468               | 4503         |
| British / Dutch colony         | .470    | .499               | 3835         |
| French colony                  | .303    | .459               | 3835         |
| Africa                         | .639    | .480               | 3835         |
| Latin America / Caribbean      | .144    | .351               | 3835         |
| 30 yrs independent             | .345    | .475               | 4503         |
| Colonial representation        | .481    | .499               | 4503         |
| Colonial democracy             | .443    | .498               | 4503         |
| <i>Cross-sectional</i>         |         |                    |              |
| Share democratic               | .297    | .379               | 76           |
| Ever democratic                | .737    | .443               | 76           |
| Log GDP per capita (2015)      | 8.807   | 1.300              | 76           |
| Log population (2015)          | .738    | 2.320              | 76           |
| Colonial representation (1955) | .763    | .428               | 76           |
| Colonial democracy (1955)      | .316    | .468               | 76           |
| Population density (1955)      | 321.237 | 1709.174           | 61           |

Table A2. Discrepancies with Cheibub et al. (2010), non-timing issues between 1950 and 2008

| Country                  | Years     | Discrepancy                                                                                                                                                                                        |
|--------------------------|-----------|----------------------------------------------------------------------------------------------------------------------------------------------------------------------------------------------------|
| Botswana                 | 1966-2018 | Coded as democracy (as DD Type II category)                                                                                                                                                        |
| Côte d'Ivoire            | 2000      | Coded as military dictatorship due to interim president                                                                                                                                            |
| Equatorial Guinea        | 1969-1970 | Coded as presidential democracy, as colonial elections bringing the government to power were democratic                                                                                            |
| Fiji                     | 1992-1998 | Coded as weak presidential due to constitutional status of the president                                                                                                                           |
| France                   | 1963-1964 | Coded as presidential democracy due to implementation of constitutional amendment in 1963                                                                                                          |
| Ghana                    | 1969-1971 | Coded as weak presidential due to constitutional status of the president                                                                                                                           |
| Guyana                   | 1993-1997 | Coded as democratic as power alternates in elections in November 1992                                                                                                                              |
| Kenya                    | 1963      | Coded as democracy, as colonial elections bringing the government to power were democratic                                                                                                         |
| Korea, People's Republic | 1994-2008 | Coded as military dictatorship due to de facto military status of Kim Il-Sung                                                                                                                      |
| Malaysia                 | 2008      | Coded as democratic, as power alternates in elections in 2008                                                                                                                                      |
| Lesotho                  | 1966      | Coded as democracy, as colonial elections bringing the government to power were democratic                                                                                                         |
| Micronesia               | 1991-2008 | Coded as weak presidential due to constitutional status of the president                                                                                                                           |
| Mongolia                 | 1990-1991 | Coded as weak presidential due to interim constitutional status of the president                                                                                                                   |
| Myanmar                  | 1950-1956 | Coded as weak presidential due to interim constitutional status of the president                                                                                                                   |
| Myanmar                  | 1958-1959 | Coded as civilian autocracy                                                                                                                                                                        |
| Myanmar                  | 1960-1961 | Coded as democracy, as the party representing the incumbent military regime lost the 1960 elections.                                                                                               |
| Nicaragua                | 1984-1989 | Coded as civilian autocracy due to irregularities in the 1984 elections                                                                                                                            |
| Seychelles               | 1976      | Coded as presidential democracy, as colonial elections bringing the government to power were democratic                                                                                            |
| Singapore                | 2004-2008 | Coded as civilian autocracy based on the civilian status of the president while Cheibub et al. code it as a military dictatorship, as Prime Minister Lee Hsieng Loong used to be Brigadier General |
| Taiwan                   | 1996-1999 | Coded as civilian autocracy, as the first direct presidential elections were won by the representative of the incumbent regime and power only alternated in 2000                                   |
| Turkey                   | 1961-2008 | Coded as weak presidential due to interim constitutional status of the president                                                                                                                   |
| Uganda                   | 1962      | Coded as democracy, as colonial elections bringing the government to power were democratic                                                                                                         |
| Venezuela                | 2000      | Coded as civilian autocracy, as parliament gave the president unlimited decree power for 12 months                                                                                                 |
